# Supplementary material for: Hexagonal Boron Nitride as Filler for Silica-Based Elastomer Nanocomposites
Source: MDPI journal article supplement (doi:10.3390/nano14010030), 2023-12-21
Supplement: s1 [file s1]

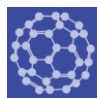

# Hexagonal Boron Nitride as Filler for Silica-Based Elastomer Nanocomposites

Federica Magaletti <sup>1</sup>, Gea Prioglio <sup>1</sup>, Ulrich Giese <sup>2</sup>, Vincenzina Barbera <sup>1,\*</sup> and Maurizio Galimberti <sup>1,\*</sup>

<sup>1</sup> Department of Chemistry, Materials and Chemical Engineering “G. Natta”, Politecnico di Milano, Via Mancinelli 7, 20131 Milano, Italy; federica.magaletti@polimi.it (F.M.); gea.prioglio@polimi.it (G.P.)

<sup>2</sup> Deutsches Institut für Kautschuktechnologie e. V., Eupener Straße 33, 30519 Hannover, Germany

\* Correspondence: vincenzina.barbera@polimi.it (V.B.); maurizio.galimberti@polimi.it (M.G.)

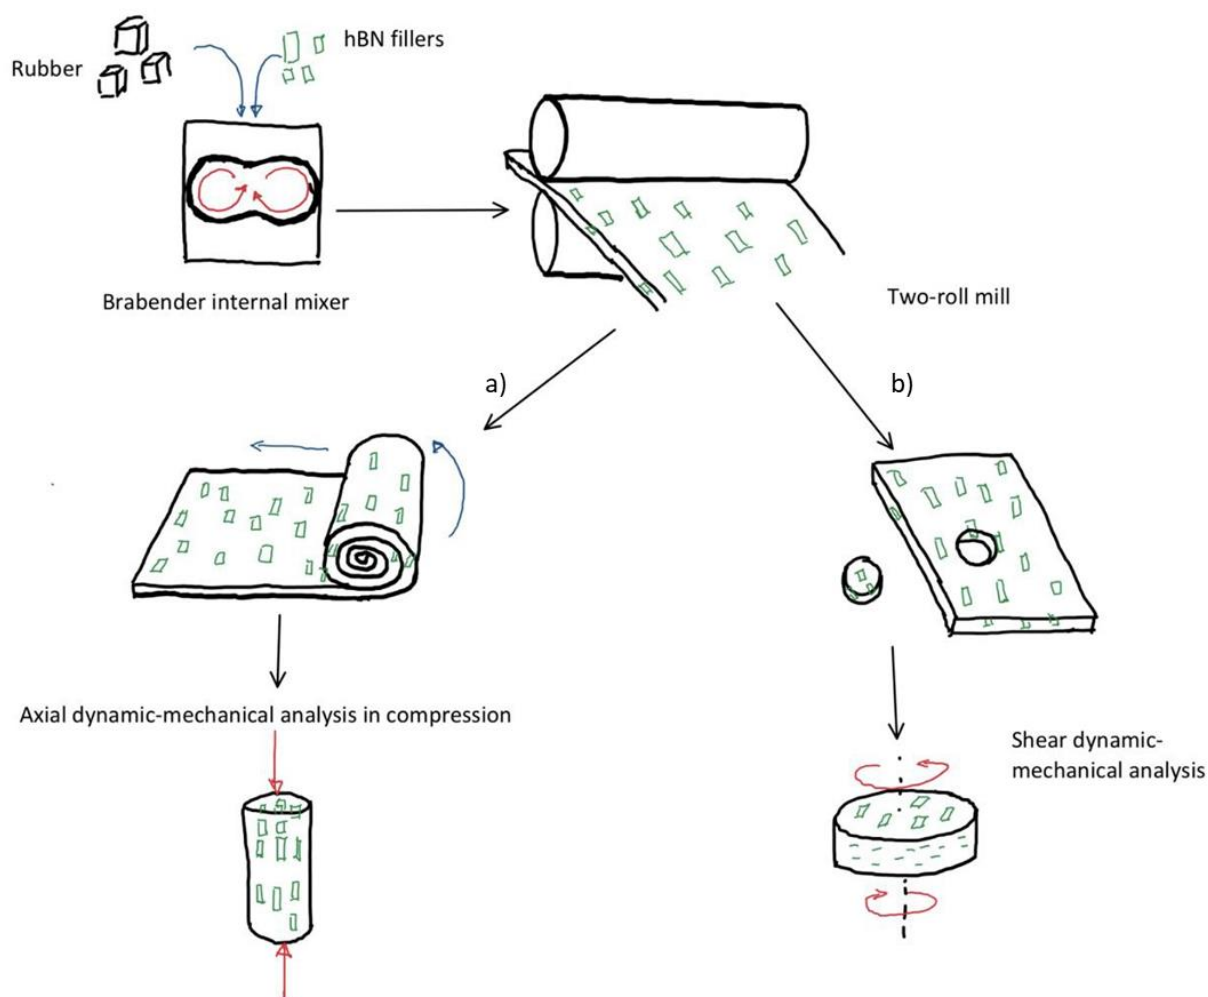

**Figure S1.** Procedures for the preparation of specimens for axial dynamic-mechanical analyses (a) and shear dynamic mechanical analyses (b).

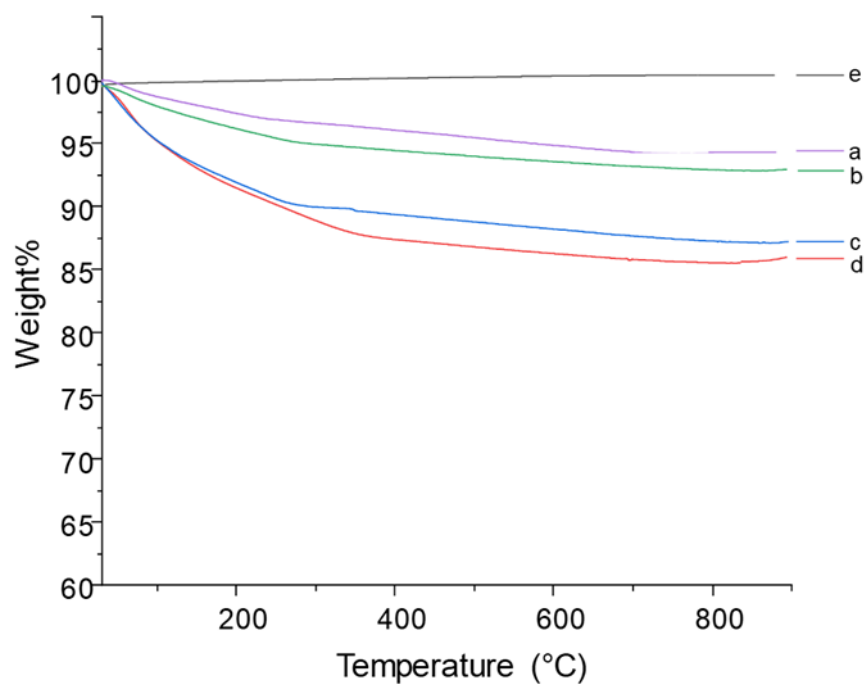

**Figure S2.** TGA thermograms under air of hBN-OH<sub>as5h</sub> (a); hBN-OH<sub>w5h</sub> (b); hBN-OH<sub>as10h</sub> (c) and hBN-OH<sub>w10h</sub> (d). Pristine hBN (e).

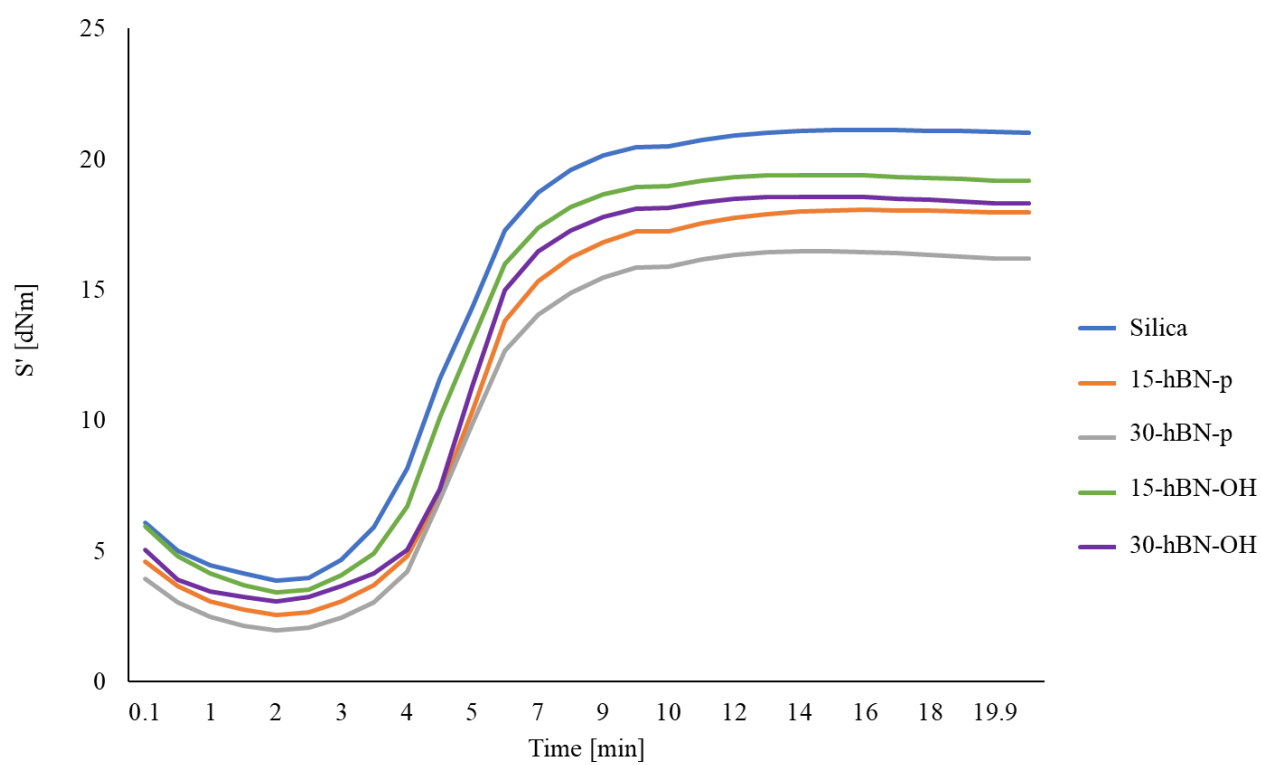

Figure S3. Crosslinking curves of composites of Table 1.

**Table S1.** Shear dynamic-mechanical properties from strain sweep experiments of composites of Table 1.

|                                                  | Silica | 15-hBN-p | 30-hBN-p | 15-hBN-OH | 30-hBN-OH |
|--------------------------------------------------|--------|----------|----------|-----------|-----------|
| <b><math>G'_{\gamma_{\min}}</math> [MPa]</b>     | 2.40   | 1.76     | 1.40     | 2.17      | 1.90      |
| <b><math>G'_{\gamma_{\max}}</math> [MPa]</b>     | 1.28   | 1.08     | 0.97     | 1.18      | 1.09      |
| <b><math>\Delta G'</math> [MPa]</b>              | 1.11   | 0.69     | 0.43     | 0.99      | 0.81      |
| <b><math>\Delta G'/G'_{\gamma_{\min}}</math></b> | 0.46   | 0.39     | 0.31     | 0.46      | 0.43      |
| <b><math>G''_{\max}</math> [MPa]</b>             | 0.18   | 0.14     | 0.09     | 0.15      | 0.14      |
| <b><math>\tan\delta_{\max}</math></b>            | 0.11   | 0.10     | 0.08     | 0.11      | 0.09      |

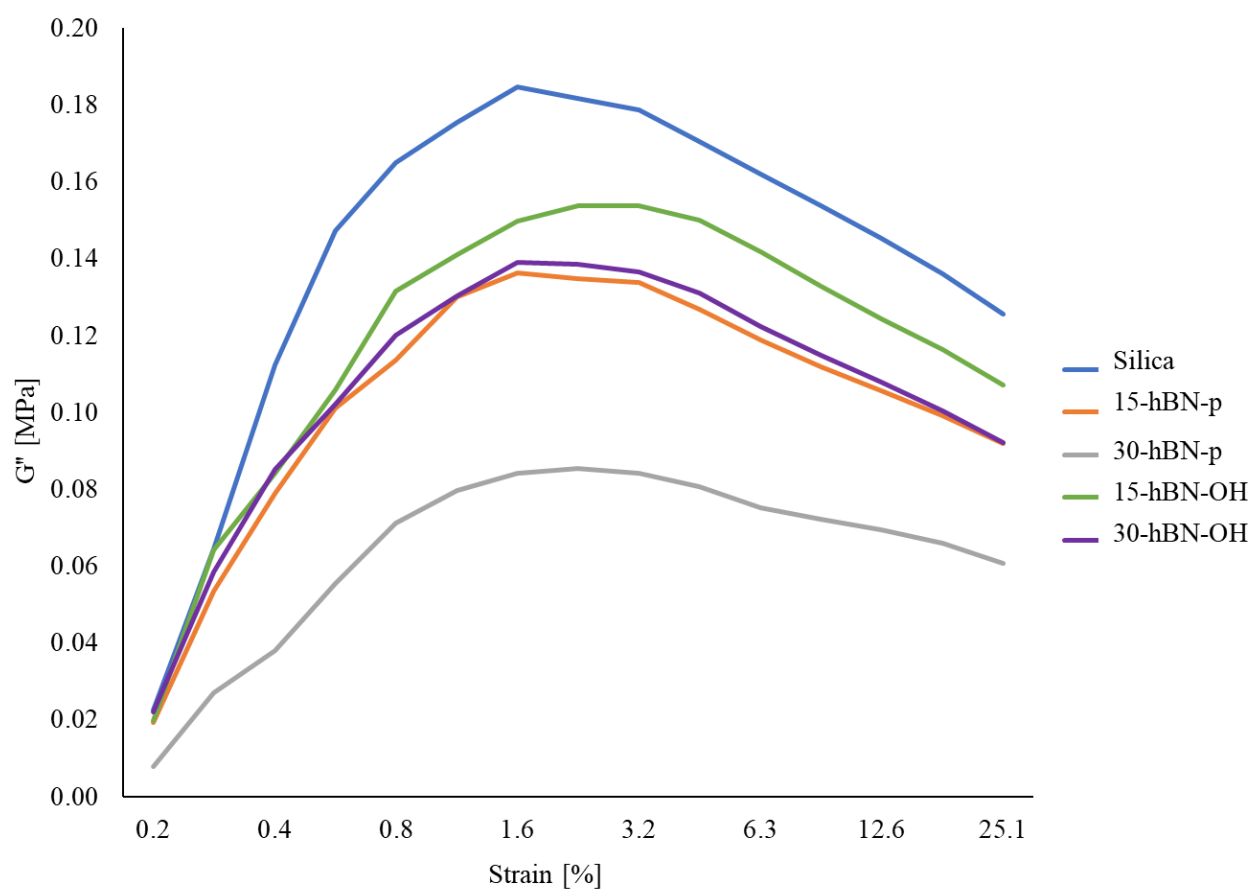

**Figure S4.**  $G''$  vs strain for composites of Table 1.

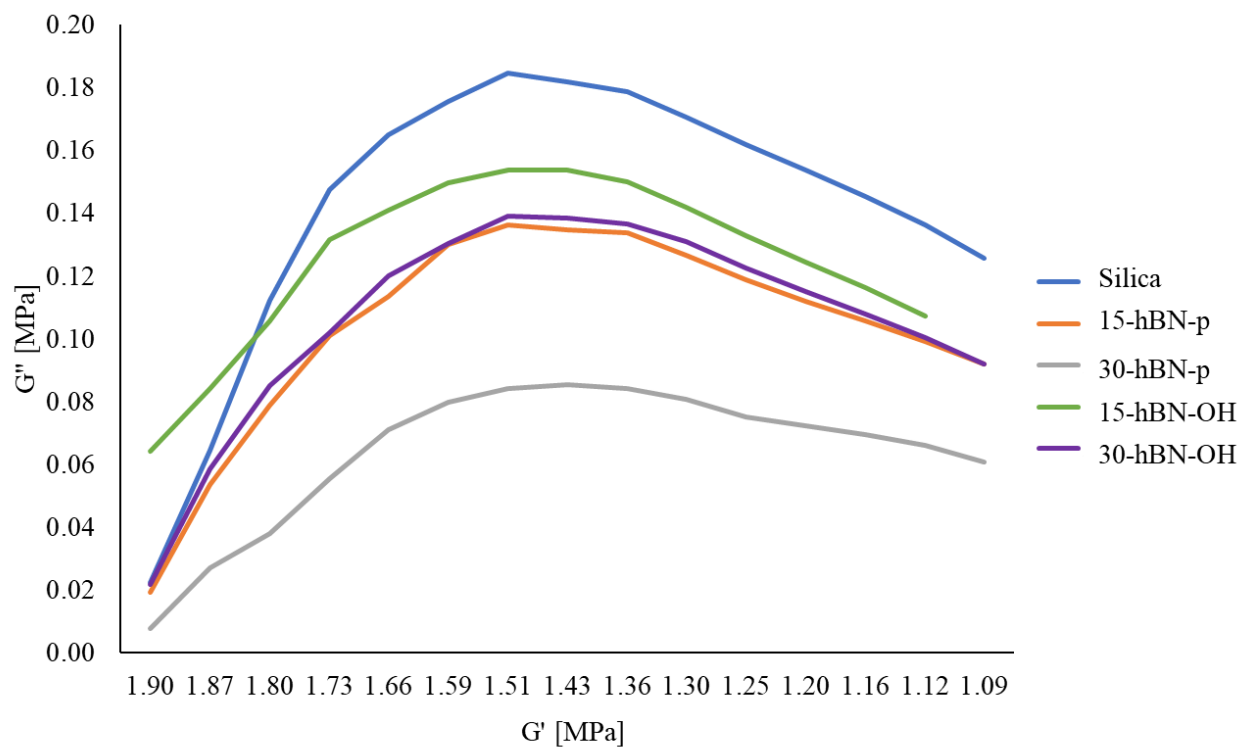

**Figure S5.** G plot for for composites of Table 1.

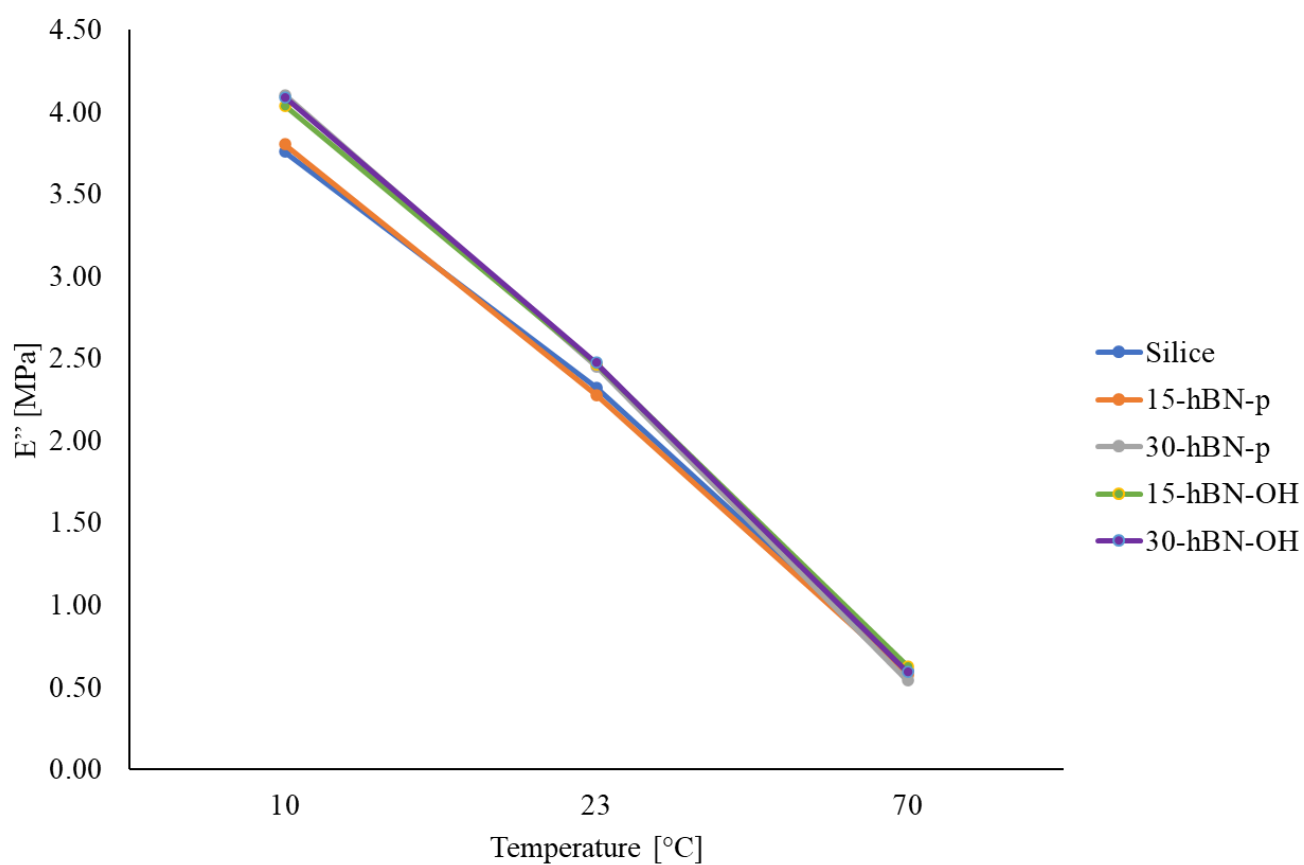

**Figure S6.**  $E''$  vs Temperature for for composites of Table 1.
